# Supplementary material for: Markedly different impacts of primary emissions and secondary aerosol formations on aerosol mixing states revealed by simultaneous measurements of CCNC, V/HTDMA and SP2
Source: Copernicus journal article supplement (doi:10.5194/acp-2022-840), 2023-02-14
Supplement: Supplementary file [file acp-2022-840-AC1-supplement.pdf]

Reviewer #1:

*General comments:*

*The presented study investigates the mixing state of aerosol particles using different techniques: H- and V-TDMA, CCNC, and SP2 measurements are available in connection with chemical measurements for a 1-month campaign in the North China plain (NCP). This combination provides a useful data set to investigate the aerosol mixing state. However, this combination of measurements gives a lot of information and in this study many parameters were calculated. To understand the relationships and differences between these parameters, they need to be explained and presented in more detail. I believe, the data itself are worth to be published, but the quality of analysis and publication should be improved. The authors use too many abbreviations that disrupt the flow of reading. Some abbreviations are not explained at all, but I think even those that are well known in a particular community should be written out at least once. Furthermore, the statistical analysis is not convincing. Linear correlations are applied to all data points, but in my view, they do not well describe the data in all cases. A critical analysis is needed here to determine which of these statistical results are meaningful. This is my main criticism of this work.*

*The quality of the language is not very good and the manuscript is not easy to read. I recommend a complete check by a native speaker.*

*Thus, the paper needs major revision regarding the statistical analysis. After that, the text should be partly rewritten or at least significantly revised before it can be accepted for publication in ACP.*

**Response:** Thanks for your comments. This study provides a first-time intercomparison of aerosol mixing state parameters from the instruments including DMA-SP2, DMA-CCN, HTDMA and VTDMA and offers insights into the interlink among these parameters and potential influencing factors. Aerosol mixing states were usually investigated using one or two of instruments listed above, however, none of them could deliver a full picture of aerosol mixing state variations. The purpose of this paper is to investigate what's the difference among these mixing state parameters and mechanism behind those difference under atmospheric conditions of the campaign, which helps aerosol scientists to understand better aerosol mixing states obtained using different techniques and also design better their future aerosol experiments, because differences among mixing state parameters might deliver important message about physical and chemical properties of primary and secondary aerosols as discussed in this study. Some observed differences can be qualitatively explained based on existing knowledge; however, some differences help us explore possible properties of primary and secondary aerosols and might deliver phenomena that urge explanation in the future. If we go very detail into the variations of each aerosol mixing

state parameters, the manuscript would be very long and more difficult for readers because it was very difficult to find readers who understand very well all instruments listed above (DMA-SP2, DMA-CCN, HTDMA, VTDMA) and aerosol primary emissions as well as atmospheric chemistry related with secondary aerosol formations. The authors struggled in writing this manuscript because this is also difficult for us, although the first author has very good records of research using DMA-CCN and HTDMA, and the corresponding author have good records of aerosol physical properties and atmospheric chemistry. We decided to write this paper because we find this might be important and interesting for aerosol community, and also helpful for us and we want to share these insights. Actually, we plan to dig more into these variations based on insights obtained in this research in the our future studies.

We agree with the reviewer that some places should be explained more in detail, and therefore more explanations were added before reaching conclusions in some parts as recommended by the reviewer#2.

In terms of statistical analysis, we use linear correlations to examine whether the primary emissions or the secondary aerosol formations have significant impacts on the aerosol mixing state parameters, rather than getting linear relationships. Linear fittings in the manuscript delivered false impression thus all linear fittings are removed in related figures and leave only correlation coefficients. We discussed this with authors and believe that there are no explicit relations among these parameters, thus correlation test is the only way we could have now based on our limited measurements to explore potential influencing factors as what was done in most previous papers that discuss possible mechanisms behind variations in mixing state parameters.

In terms of writing, the reviewer#2 have raised a lot of comments to help improve the readability, and we revised the manuscript based on comments of both reviewers which is beneficial for non-expert readers.

*Comments in detail:*

*There are basic criticisms of the manuscript, so I will go into less detail. Most of my comments are more general, only few of them focus on typos and so on, which does not mean, that these are all minor comments. But I would focus on the detail after the rest is done.*

*Examples for abbreviations, that are never written out:*

*SOA, POA, SSOA, BBOA, CCOA, FFOA, MAF..*

*Some of them are well known, others not. I do not know all of them which makes the reading really difficult. Each abbreviation has to be explained once, but I would suggest to use less abbreviations in general. Even if abbreviations are explained in the technical section and*

used later without explanations does not really help. I prefer written text, it helps a lot to understand the text much better. In my view it is required to explain those abbreviations, which are not widely known, such as MAF, CCOA, regularly again, also in figure captions.

**Response:** Thanks for your suggestion. We have added a table listing the definition and description of the abbreviations as follow:

**Table 1. Definition and description of the abbreviations.**

| Abbreviations      | Full name and/or Definition                                                                                                                                                                                                                                                   |
|--------------------|-------------------------------------------------------------------------------------------------------------------------------------------------------------------------------------------------------------------------------------------------------------------------------|
| BBOA               | Biomass Burning Organic Aerosol<br>In this study, characterized by obvious m/z 60 (mainly C <sub>2</sub> H <sub>4</sub> O <sub>2</sub> <sup>+</sup> ) and 73 (mainly C <sub>3</sub> H <sub>5</sub> O <sub>2</sub> <sup>+</sup> ), which are two indicators of biomass burning |
| FFOA               | Fossil Fuel Organic Aerosol<br>A mixed factor in this study that comprises traffic emissions and coal combustions, which was characterized by typical hydrocarbon ion series                                                                                                  |
| OOA                | Oxygenated Organic Aerosol                                                                                                                                                                                                                                                    |
| OOA1 and OOA2      | Two OOA factors resolved from the PMF analysis                                                                                                                                                                                                                                |
| SOA                | Secondary Organic Aerosols<br>Summation of OOA1 and OOA2                                                                                                                                                                                                                      |
| POA                | Primary Organic Aerosols<br>Summation of BBOA and FFOA                                                                                                                                                                                                                        |
| PM <sub>2.5</sub>  | Particulate Matter with aerodynamic diameter less than 2.5 μm                                                                                                                                                                                                                 |
| PM <sub>1</sub>    | Particulate Matter with aerodynamic diameter less than 1 μm                                                                                                                                                                                                                   |
| NR-PM <sub>1</sub> | Non-refractory PM <sub>1</sub>                                                                                                                                                                                                                                                |
| MF                 | Mass Fraction                                                                                                                                                                                                                                                                 |

|             |                                                                                                                                                              |
|-------------|--------------------------------------------------------------------------------------------------------------------------------------------------------------|
| $D_p$       | Particle diameter after humidification or heating                                                                                                            |
| $D_d$       | Particle diameter under dry conditions without humidification or heating                                                                                     |
| $K$         | Hygroscopicity parameter                                                                                                                                     |
| SS          | Super-saturation                                                                                                                                             |
| SPAR        | Size-resolved Particle Activation Ratio<br>Size-dependent CCN activity under a specific SS                                                                   |
| MAF         | Maximum Activation Fraction<br>An asymptote of the measured SPAR curve at large particle sizes and represents the number fraction of CCNs to total particles |
| $D_a$       | Midpoint activation diameter<br>Linked to the hygroscopicity of CCNs                                                                                         |
| GF          | Growth factor<br>The ratio between particle with and without humidification, and is linked to aerosol hygroscopicity                                         |
| SF          | Shrinkage Factor<br>The ratio between particle with and without heating, and is linked to aerosol volatility                                                 |
| PDF         | Probability Distribution Function                                                                                                                            |
| $NF_H$      | Number Fraction of Hydrophilic aerosol whose hygroscopicity parameter is higher than $\sim 0.07$ .                                                           |
| $NF_V$      | Number Fraction of Volatile aerosol whose Shrink Factor at $200\text{ }^\circ\text{C}$ is lower than 0.85.                                                   |
| $NF_{noBC}$ | Number Fraction of BC-free particles                                                                                                                         |
| $NF_{CBC}$  | Number Fraction of thickly coated BC particles                                                                                                               |

|                                                                                                                                                |                                                                                                                                                                                                     |
|------------------------------------------------------------------------------------------------------------------------------------------------|-----------------------------------------------------------------------------------------------------------------------------------------------------------------------------------------------------|
| $R_{\text{exBC}}$                                                                                                                              | <p>Number concentration ratio of externally BC particles in total BC-containing particles.</p> <p>Externally BC particles are defined as identified bare/thinly coated BC-containing particles.</p> |
| $NF_A - NF_B$<br>$(NF_{\text{noBC}} - NF_H, NF_V - NF_H,$<br>$NF_{\text{noBC}} - NF_V, NF_V - \text{MAF},$<br>$NF_{\text{noBC}} - \text{MAF})$ | <p>The difference between the number fraction of A and B.</p>                                                                                                                                       |

**In addition, we have also added the definition and description of the abbreviations in the caption of the figures for clarification and improving readability.**

*Section 2.2:*

*Some more technical details about the aerosol measurements would be helpful. What type of inlet was used? Was the measurement flow dried? How was the relative humidity in the inlet flow?*

**Response:** Thanks for your suggestion. We have added technical details about the aerosol measurements in Section 2.1 as follow:

“The inlet was switched among three impactors: TSP (Total Suspended Particles), PM<sub>2.5</sub> (Particulate matter with aerodynamic diameter less than 2.5 μm) and PM<sub>1</sub> (Particulate matter with aerodynamic diameter less than 1 μm). Inlet changes would affect the dry state aerosol sampling due to aerosol hygroscopic growth or activation. However, the aerosol mixing state and aerosol chemical composition measurements were made on submicron aerosols, inlet change almost does not affect those measurements under conditions of RH less than 90%, and this would be discussed very carefully in our next paper. The sampled aerosol was dried by two parallelly assembled Nafion dryers with length of 1.2 m. During autumn and winter in the NCP, ambient air temperature (lower than 20 °C and can down to 0 °C) can be significantly lower than the room temperature (~24 °C), this dryer can maintain the RH of sampled aerosols to below 20%.”

*Were losses in inlet line and sampling systems considered?*

**Response:** losses in inlet line and sampling systems are not considered in this study. reasons are listed below: (1) investigated mixing state parameters are represented by

number fractions of different diameters which are much less affected by losses in sampling systems compared with absolute number concentrations; (2) good consistency was achieved between measurements of particle number size distributions (PNSD) by particle sizer and mass concentrations measured by AMS, with the average ratio between volume concentration derived from AMS and rBC measurements and volume concentration derived from PNSD measurements is 0.79 ( $R=0.97$ , as shown in the following), which is consistent with previous reports due to that AMS cannot detect aerosol components such as dust (Kuang et al., 2021). This means that almost same aerosol populations were sampled by AMS and instruments of measuring aerosol mixing states.

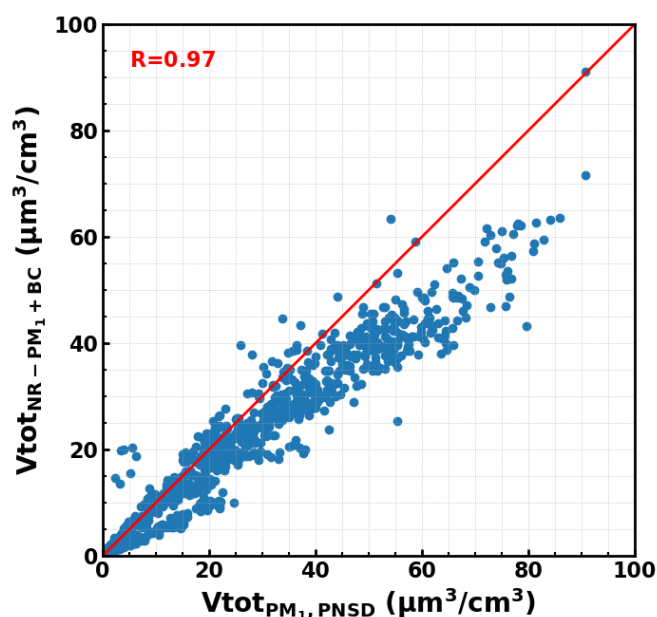

Fig. S3. Comparison between aerosol volume concentration derived from measurements of PNSD and aerosol chemical compositions.

The following sentences are added in the revised manuscript.

“Note that losses in inlet line and sampling systems are not considered in this study. reasons are listed below: (1) investigated mixing state parameters are represented by number fractions of different diameters which are much less affected by losses in sampling systems compared with absolute number concentrations; (2) good consistency was achieved between measurements of particle number size distributions (PNSD) by particle sizer and mass concentrations measured by AMS, with the average ratio between volume concentration derived from AMS and rBC measurements and volume concentration derived from PNSD measurements is 0.79 ( $R=0.97$ , as shown in Fig.S3), which is consistent with previous reports due to that AMS cannot detect aerosol components such as dust (Kuang et al., 2021). This means that almost same aerosol populations were sampled by AMS and instruments of

measuring aerosol mixing states.”

*Dd is probably the dry diameter?! This is not explained. What means ‘dry’? Just not humidified?*

**Response:** Yes, Dd is the dry diameter particle, which corresponds to particle diameter under dry conditions (RH<20%) and not humidified. For clarification, we have revised the description of Equation (1) as:

“... The HV-TDMA consists of two DMA (Model 3081L, TSI Inc.), with the first DMA (DMA1) selecting dried particles without conditioning and the second DMA (DMA2) selecting conditioned particles. ... The RH-dependent hygroscopic growth factor (GF) at a certain dry diameter (D<sub>d</sub>) is calculated as follows:

$$GF = \frac{D_p(RH)}{D_d} \quad (1)$$

Where D<sub>p</sub>(RH) is the particle diameter undergo humidification. In this mode, four dry electrical mobility diameters (50, 100, 150 and 200 nm) were measured. ...”

*The same diameters Dd and DP are used in the definition for the shrinking factor, what is the meaning here?*

**Response:** Thanks for your suggestion. In the definition for the shrinking factor, Dd is the dry diameter particle, which corresponds to particle diameter under dry conditions and not heated while Dp is the particle diameter after heating. we have revised the description of Equation (2) as:

“The temperature dependent shrinkage factor (SF), which is the ratio of the heated particle size to the dry particle size without heating (D<sub>d</sub>), is defined as:

$$SF = \frac{D_p(T)}{D_d} \quad (2)$$

Where D<sub>p</sub>(T) is the particle diameter undergo heating. ...”

*Section 2.3:*

*Parameterization of the SPAR function is not easy to understand without knowing how it looks like. Can the authors give an example?*

**Response:** Thanks for your suggestion. As shown in Figure S4, the measured SPAR is generally characterized as a sigmoidal curve (the black line). MAF is the asymptote of

the measured SPAR curve at large particle sizes and  $D_a$  indicates the diameter where SPAR equals the half of the MAF value. The parameter  $\sigma$  corresponds to the slope of steep increase of SPAR curves when diameter is close to  $D_a$ .

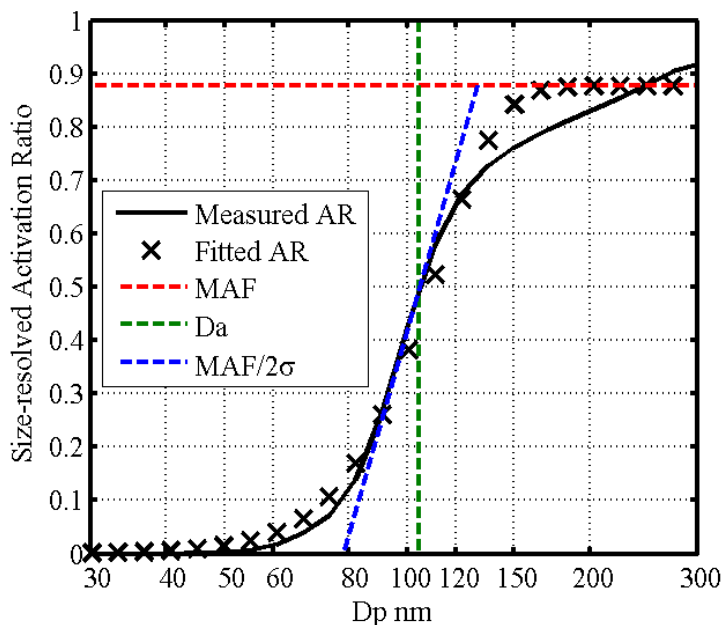

**Fig. S4. Schematic of the parameterization scheme of SPAR curves. The black solid curve and the black crossing are the measured SPAR and fitted SPAR with the parameterization scheme. The red, green and blue dashed lines indicate the fitting parameters of Maximum Activation Fraction (MAF), the midpoint activation diameter ( $D_a$ ) and  $s$ , respectively.**

We have added this figure into the supplement and revised the description of SPAR parameterization scheme as:

“The measured SPAR curves can be parameterized with a sigmoidal function with three parameters. As shown in Fig. S4, the measured SPAR is generally characterized as a sigmoidal curve. This parameterization assumes that the aerosol is an external mixture of hydrophilic particles that are CCN-active and hydrophobic particles that are CCN-inactive (Rose et al., 2010). The formula used to parameterize SPAR ( $R_a(D_d)$ ) for a specific SS is as follows (Rose et al., 2008):

$$R_a(D_d) = \frac{MAF}{2} \left( 1 + \operatorname{erf} \left( \frac{D_d - D_a}{\sqrt{2\pi}\sigma} \right) \right) \quad (7)$$

where erf is the error function. MAF (Maximum Activation Fraction) is an asymptote of the measured SPAR curve at large particle sizes as shown in Fig. S4, and it represents the number fraction of CCNs to total particles.  $D_a$  is the midpoint activation diameter and is linked to the hygroscopicity of CCNs, and indicates the diameter where SPAR



equals the half of the MAF value.  $\sigma$  is the standard deviation of the cumulative Gaussian distribution function and characterizes the heterogeneity of CCN hygroscopicity. In Fig. S4, the parameter corresponds to the slope of steep increase of SPAR curves when diameter is close to  $D_a$ . ...”

*People, who are not familiar with the SP2 do not understand the explanation given here. What does the lag time mean? Why is it called lag time? By the way, there are three different ways of writing in the manuscript: lagtime, lag-time and lag time, for consistency one should be chosen. I would take the latter one.*

**Response:** Thanks for your suggestion. The lag time is defined as the time difference between the occurrences of the peaks of the incandescence and scattering signals measured by SP2 (Moteki & Kondo, 2007; Sedlacek et al., 2012; Subramanian et al., 2010), and for coated BC particles, the incandescence signals is generally detected later than the scattering signals. As shown in former studies (Zhang et al., 2018; Zhao et al., 2021), the distribution of the lag time for ambient particles exhibits a clear two-mode distribution and this lag time can be used to indicate the coating thickness of the BC-containing aerosols.

**We have revised lagtime and lag-time to lag time, and have revised this paragraph as:**

“... For measurement of coated BC particles in SP2, the incandescence signals is generally detected later than the scattering signals and the time difference between the occurrences of the peaks of the incandescence and scattering signals is defined as the lag time (Moteki & Kondo, 2007; Sedlacek et al., 2012; Subramanian et al., 2010). The coating thickness of the BC-containing aerosols in the SP2 measurement can be indicated by the lag time (Moteki and Kondo, 2007; Schwarz et al., 2006; Sedlacek et al., 2012; Subramanian et al., 2010; Metcalf et al., 2012), which exhibits a clear two-mode distribution in former studies (Zhang et al., 2018; Zhao et al., 2021). A critical lag time threshold can be used to differentiate between the different types of BC-containing aerosols and calculate the number fraction of bare BC particles and coated BC particles in the total identified aerosols. ...”

”

*Section 3:*

*Figure 1 is very complex. Figures c – e also have a color scale on the right hand side, but this is not explained at all.*

**Response:** Thanks for your suggestion. We have revised the caption of Figure 1 by

adding descriptions of each panel and the color scale as:

“Figure 1. Overview of the measurements during the campaign: (a) meteorological parameters: wind speed (dots) and RH (black line), with colors of dots representing wind direction; (b) mass concentrations of aerosol chemical compositions: secondary inorganic aerosols (SIA, red circle), secondary organic aerosols (SOA, green plus), primary organic aerosols (POA, blue x) and black carbon (BC, black dots); (c) Size-resolved Particle Activation Ratio (SPAR) under supersaturation (SS) of 0.08% observed by DMA-CCN, with warmer colors corresponding to higher value; (d) PDF of growth factor (GFPDF) at 200 nm observed by HTDMA; (e) PDF of shrinkage factor (SFPDF) at 200 nm and 200 °C observed by VTDMA; (f) PDF of lag time at 200 nm observed by DMA-SP2. The blue, red and green shaded periods represent the three periods with moderate pollution, heavy pollution and clean condition, respectively.”

*Line 316 ff: ‘...corresponding fitting parameters, Da...’ Da is just one parameter and means probably the mean diameter? How are these diameters obtained? Da should probably be Da?! Other fitting parameters are needed?*

**Response:** Da is the midpoint activation diameter, not the mean diameter. Da is not shown in Figure 2 and may be mistaken as particle size Dp. Here we are referring to Da values during the campaign. It can be found that Da value agree with the particle size where SPAR equals about 0.5. We have revised this sentence as:

“For the three measured SSs, the particle size where SPAR equals about 0.5 are approximately 90 nm, 120 nm and 180 nm for the three SSs of 0.08%, 0.14% and 0.22%, respectively. These particle size agree with the value of the fitting parameter Da (midpoint activation diameter, see Eq.7) during the campaign, as the fitting parameter MAF (Maximum Activation Fraction, an asymptote of the measured SPAR curve at large particle sizes) is close to 1.”

*MAF seems to be another fitting parameter, but what does MAF mean?*

**Response:** MAF is Maximum Activation Fraction and an asymptote of the measured SPAR curve at large particle sizes. We have added the description of MAF where MAF is first mentioned in this section as:

“These particle size agree with the value of the fitting parameter Da (midpoint activation diameter, see Eq.7) during the campaign, as the fitting parameter MAF (Maximum Activation Fraction, an asymptote of the measured SPAR curve at large particle sizes) is close to 1.”

*There appear again lots of abbreviations, such as RexBC. This is explained once, but since it is not common, I had to look it up again and again. I would prefer reading without so many abbreviations.*

**Response:** Thanks for your suggestion. We added a table listing the description of these abbreviations as mentioned earlier, and have added the explanations of these abbreviations like RexBC where they are first introduced in each section and in caption of each figure.

*Line 371, caption figure 4 and others: the word 'composition' is used in the wrong context. The authors mean probably component(s). This appears several times in the text.*

**Response:** Thanks for your suggestion. We have revised it accordingly including:

L47: “Fossil fuel combustion-emitted BC-containing aerosols tended to be more externally mixed with other aerosol components ...”

L298: “The mass concentrations of different chemical components ...”

L308: “The diurnal variations in mass concentrations of different aerosol chemical components ...”

L363: “the mass fractions of aerosol chemical components”

L398 : “the mass fraction of each primary organic aerosol components”

Figure 7, 8 and 9: “the mass fraction of secondary aerosol chemical components”

Figure 4: “mass fraction of aerosol chemical components”

*Figure 4: what are the shaded areas? Standard deviations? Uncertainty? This has to be explained in the figure caption! My question is, if the differences e.g., between the different diameters are significant? For me, the shapes of the curves of NF for different diameters look very similar, in particular if the shaded area represents an uncertainty range.*

**Response:** Thanks for your suggestion. The shaded areas indicate the standard deviations, The difference between those of different diameters are not significant, especially for particle diameters larger than 100nm. As the reviewer #2 suggested, we keep the sizes with most concurrent measurements, e.g. 150, 200 and 300 nm and move the rest particle sizes into the supplement. In detail, we have revised Figure 4 and its caption as:

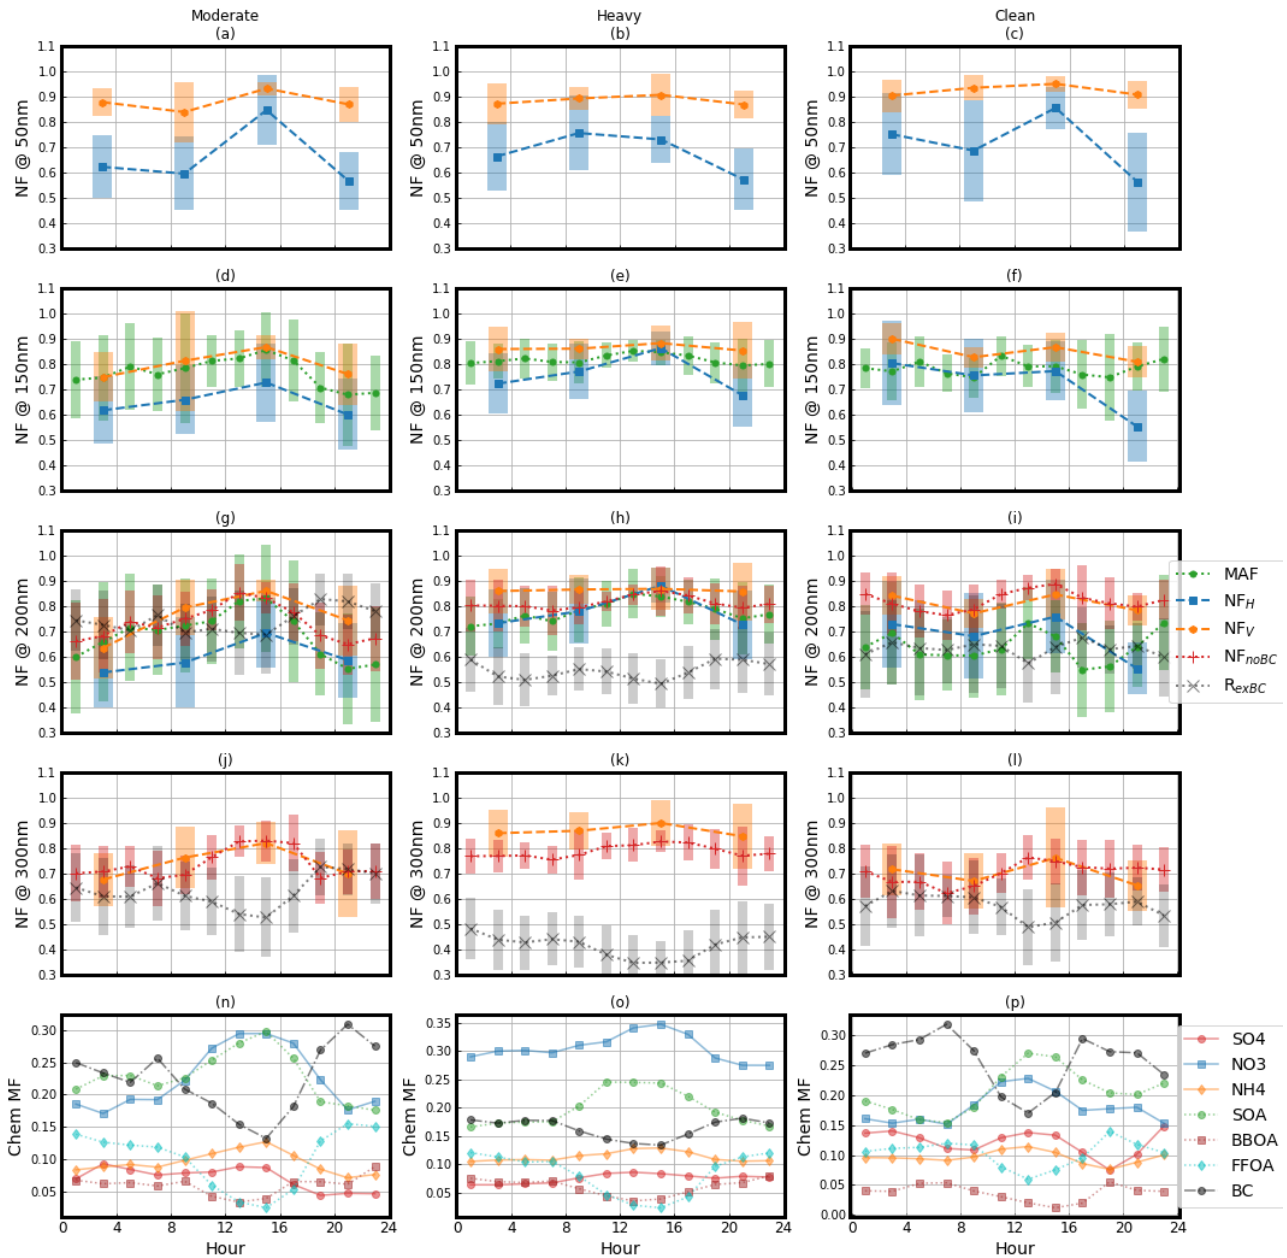

“Figure 4. (a-l) Diurnal variations of aerosol mixing state parameters (identified by color and marker) at different particle sizes (50, 150, 200 and 300 nm) during the three periods. The shaded areas indicate the standard deviations. MAF (Maximum Activation Fraction): An asymptote of the measured SPAR curve at large particle. NF<sub>H</sub>: Number Fraction of Hydrophilic aerosol whose hygroscopicity parameter is higher than ~0.07. NF<sub>V</sub>: Number Fraction of Volatile aerosol whose Shrink Factor at 200 °C is lower than 0.85. NF<sub>noBC</sub>: Number Fraction of BC-free particles. R<sub>exBC</sub>: Number fraction of externally BC particles in total BC-containing particles. (m-o) Diurnal variations of mass fractions of aerosol chemical compositions including secondary organic aerosols (SOA), biomass burning organic aerosol (BBOA), fossil fuel organic aerosols (FFOA), and

inorganic ions including sulfate (SO<sub>4</sub>), nitrate (NO<sub>3</sub>) and ammonium (NH<sub>4</sub>) (identified by color and marker) during the three periods.”

We have revised the corresponding description of Figure 4 as:

“For particle sizes larger than 100 nm (shown in both Fig. 4 and Fig. S5), there were maxima in the afternoon for MAF, NF<sub>H</sub>, NF<sub>V</sub> and NF<sub>noBC</sub>, indicative of a peak during this time due to the increase in secondary aerosol compositions like nitrate and SOA, and the decrease of POA and BC.”

We have also added Figure S4 into the supplement as:

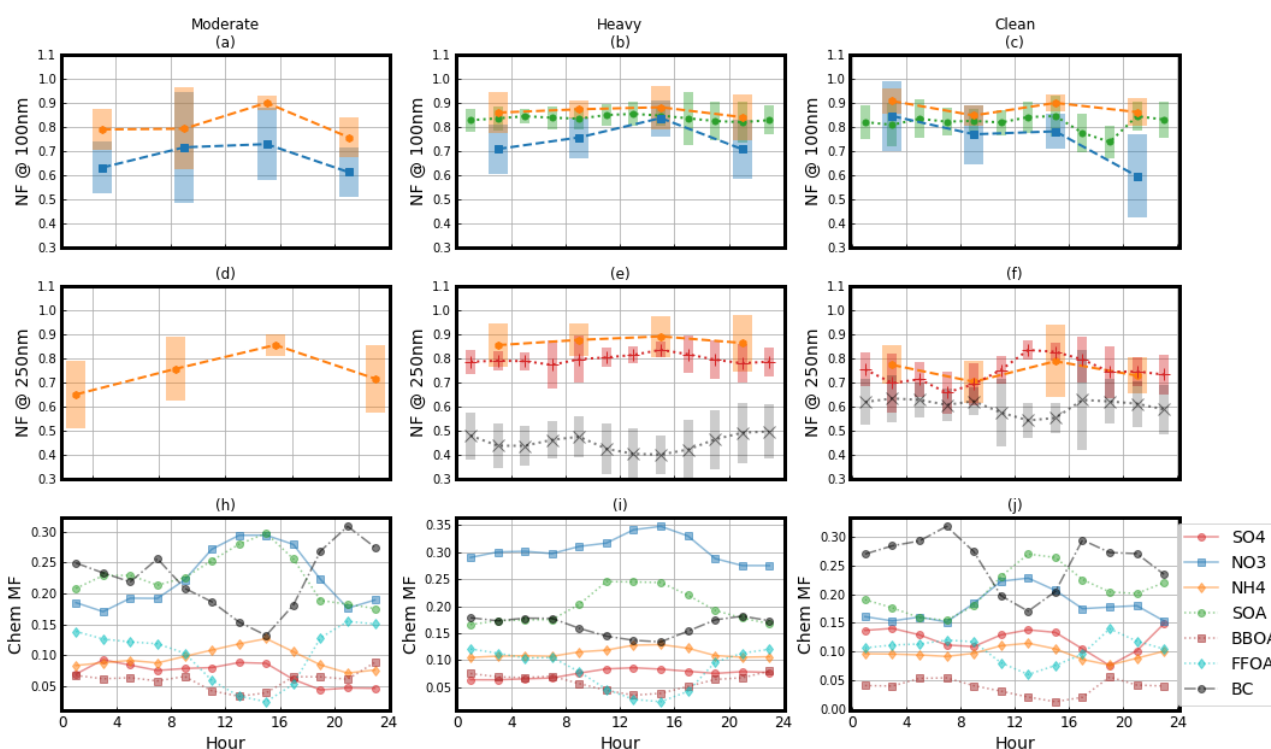

“Fig. S5. (a-f) Diurnal variations of aerosol mixing state parameters (identified by color and marker) at different particle sizes (100 and 250 nm) during the three periods. The shaded areas indicate the standard deviations. (g-i) Diurnal variations of mass fraction of aerosol chemical compositions (identified by color and marker) during the three periods.”

*In the description of this figure 4 the word ‘peak’ is frequently used, but I see only slight maxima between different times of the day. This has to be checked and needs to be adapted.*

**Response:** Thanks for your suggestion. It should be a maxima between different times of the day and is indicative of a peak in the afternoon. We have revised corresponding descriptions of figure 4 as:

“For particle sizes larger than 100 nm (shown in both Fig. 4 and Fig. S5), there were maxima in the afternoon for MAF,  $NF_H$ ,  $NF_V$  and  $NF_{noBC}$ , indicative of a peak during this time due to the increase in secondary aerosol compositions like nitrate and SOA, and the decrease of POA and BC.”

“In the clean period, there was another maxima at midnight for MAF and  $NF_{noBC}$ , which may be attributed to the diurnal variations of secondary aerosol compositions like sulfate and SOA, and the decrease of BC and FFOA.”

*Line 388: What means ‘consistency’ here? I simply do not understand it.*

**Response:** We are referring to the agreement between different aerosol mixing state parameters and we have revised this sentence as:

“The agreement between MAF and  $NF_V$  was slightly higher than that between  $NF_H$  and MAF (or  $NF_V$ ) with similar correlation coefficients ( $\sim 0.65$ ) ...”

*Figures 5 – 9: linear correlations were fitted here, but the results do not always look convincing. E.g., Figure 7: 2 lowest plots show dots widely distributed and one does not expect a linear correlation. What is the meaning of such a correlation? I strongly suggest to check the quality of these correlations and reduce to number of these plots.*

**Response:** Thanks for your suggestion. In former studies on the aerosol mixing state, it is common to investigate the linear correlations between aerosol mixing state parameters as well as aerosol chemical compositions (Reference listed in the introduction like: Zhang et al., 2014; Hong et al., 2017; Kim et al., 2020; Tao et al., 2021). In this study, the correlation analysis is used to examine whether the primary emissions or the secondary aerosol formations have significant impacts on the aerosol mixing state parameters, and for some cases there was no significant influences which also provide insights into investigating variations of mixing state parameters. In order to avoid misunderstanding and highlight the our findings, we have removed the fit lines. In detail, we have revised Figure 5-9 as:

Figure 5:

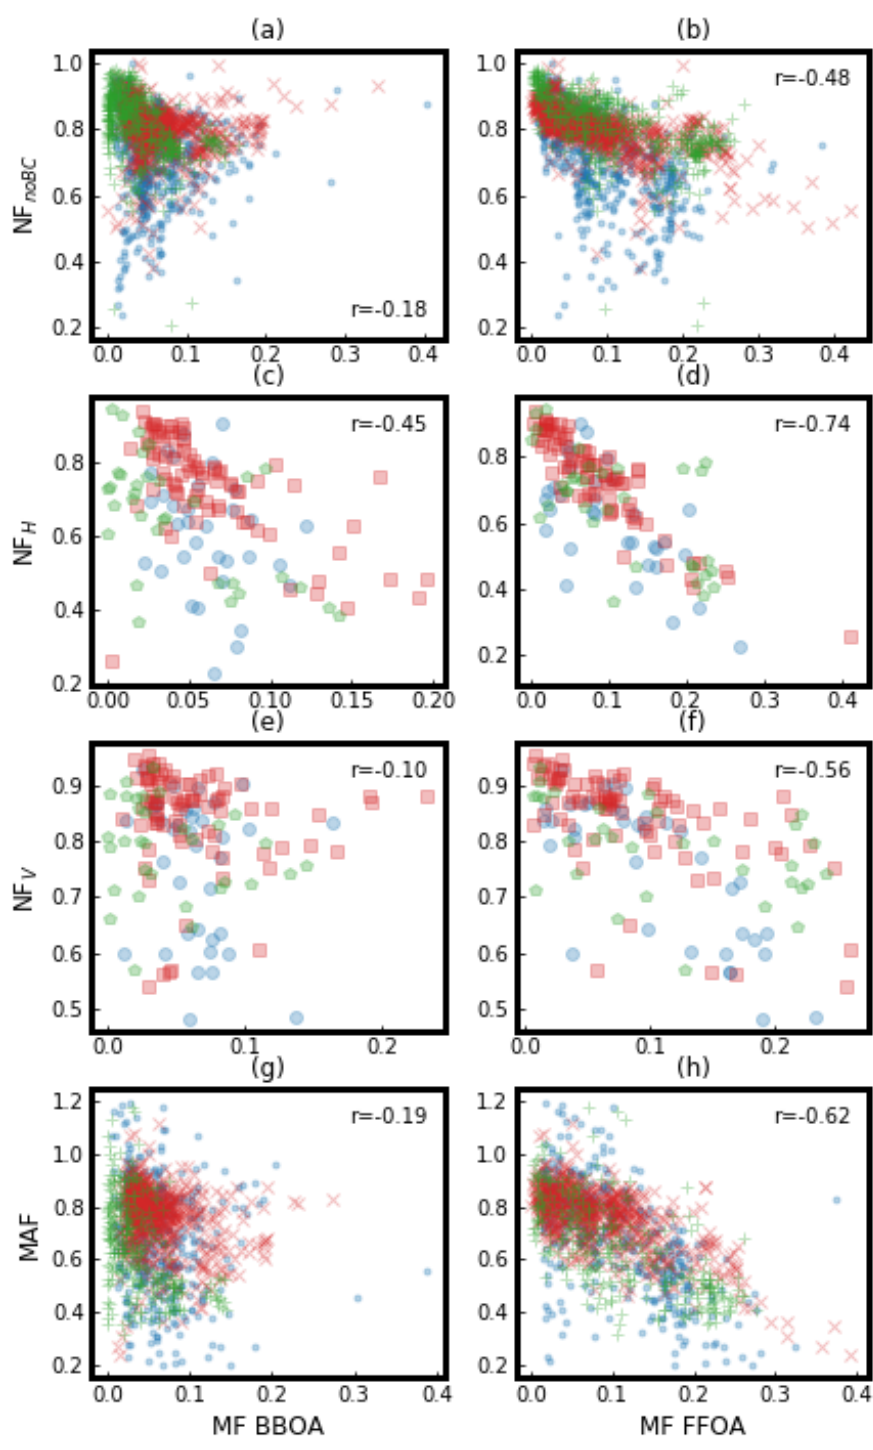

Figure 6:

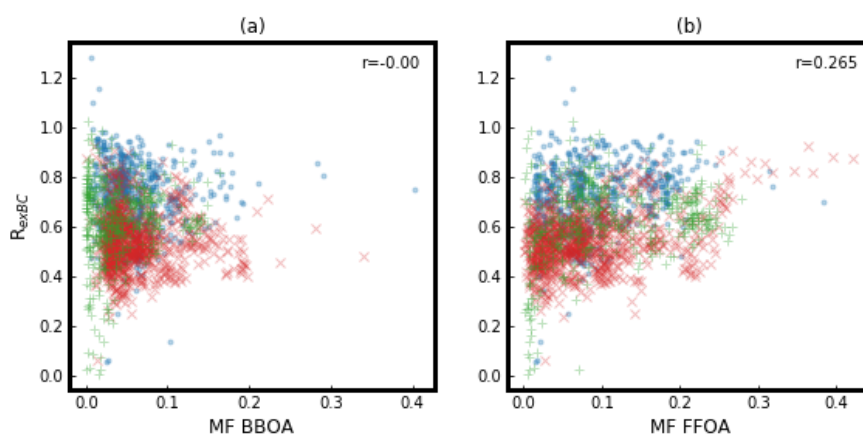

Figure 7:

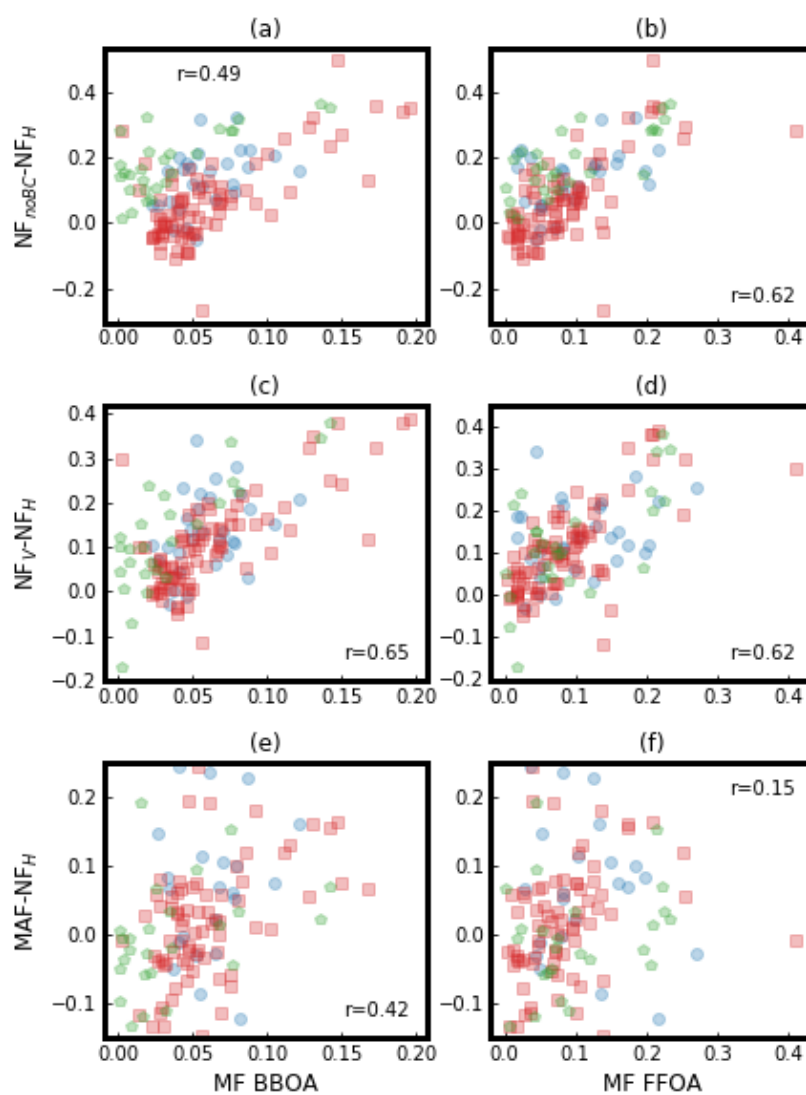



Figure 8:

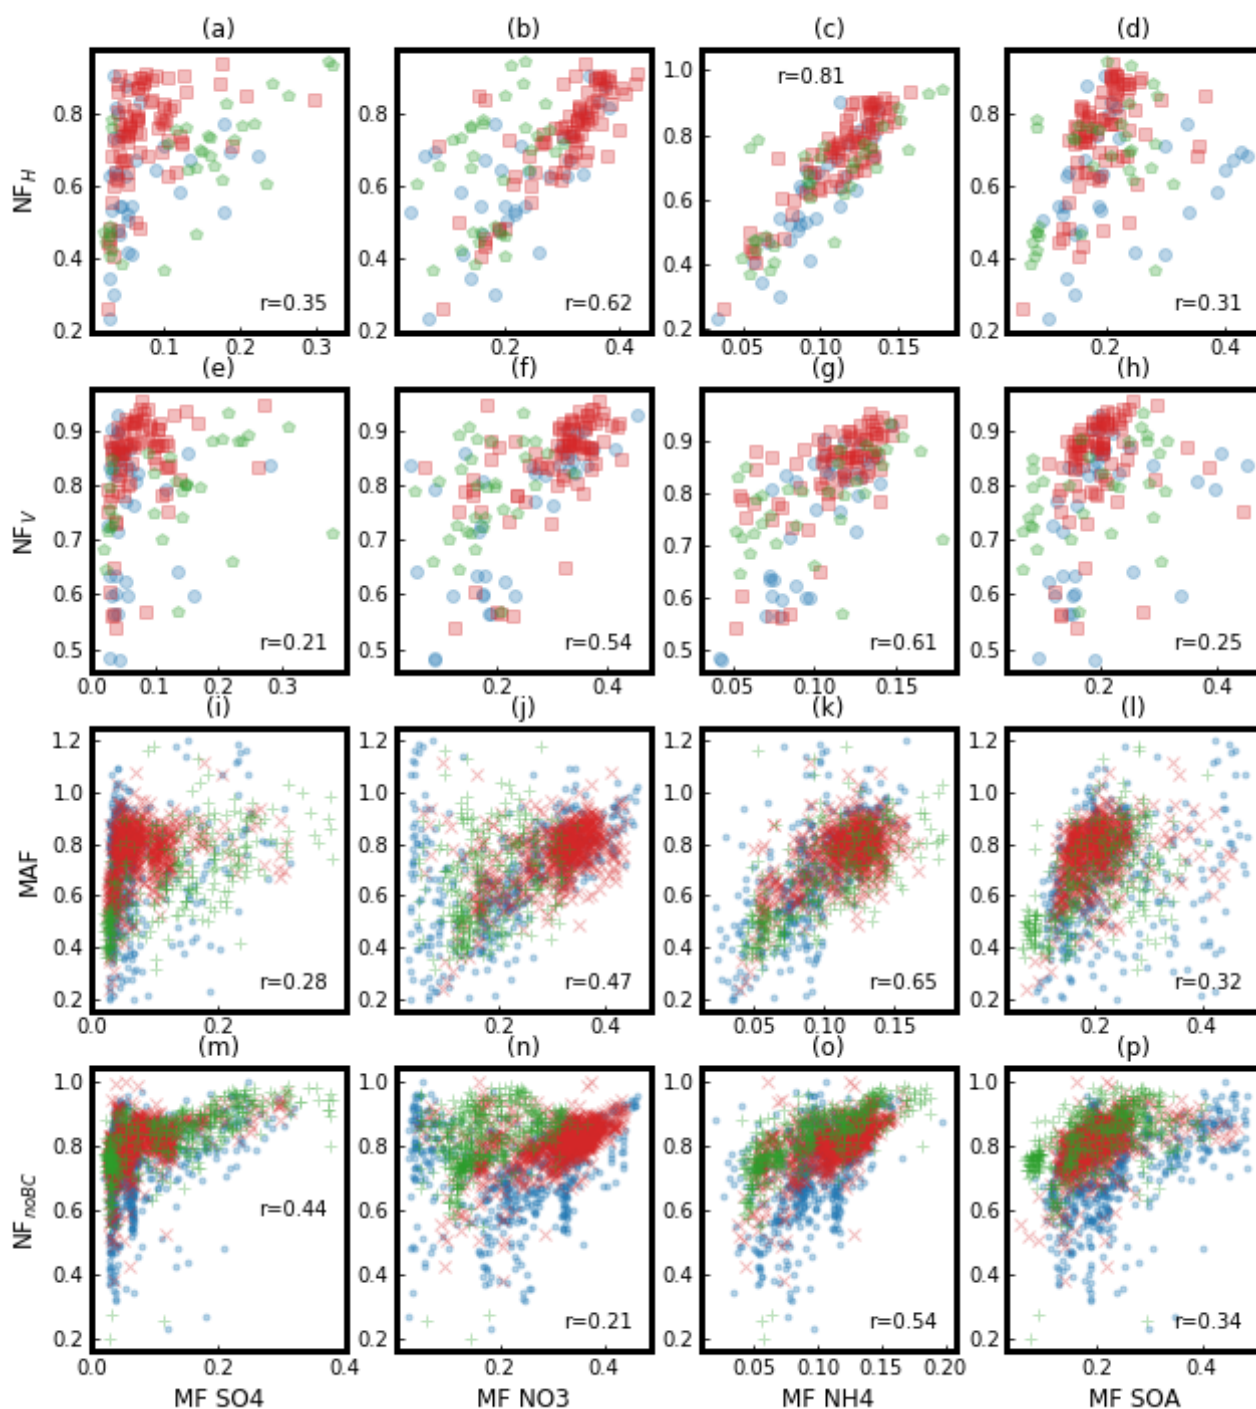

Figure 9:

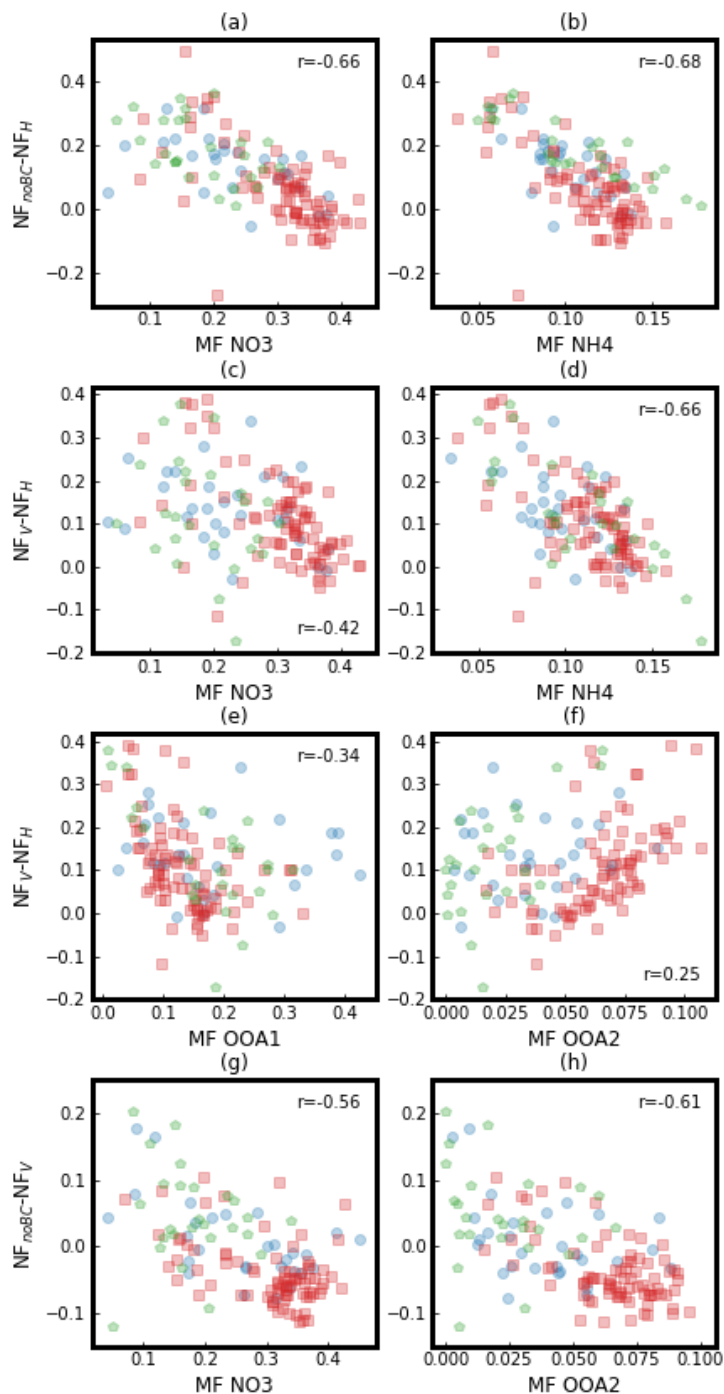

Figure 8: the lower plots seem to follow more an exponential growth, does the linear fit makes sense here?

Response: As we mentioned in the former response, the correlation analysis of this study is used to qualitatively explore whether the primary emissions or the secondary aerosol formations affect significantly on variations of aerosol mixing state

parameters, as commonly applied in former studies on the aerosol mixing state (Reference listed in the introduction like: Hong et al., 2017; Kim et al., 2020; Tao et al., 2021). We have removed the fit lines with correlation coefficient ( $r$ ) less than 0.5 as shown in the former response.

*Figure 9: what means OOA1 and OOA2?*

**Response:** OOA1 and OOA2 are two SOA factors from the PMF analysis of organic aerosol. As mentioned in Section 2.1, these two SOA factors were found to display different spectral patterns, correlations with tracers and diurnal variations, suggesting that they resulted from different chemical processing, however, the formation mechanism and possible precursors are yet to be explored in future. For example, OOA1 had higher  $\text{CO}_2^+/\text{C}_2\text{H}_3\text{O}^+$  (3.9) and O/C (0.91) ratios compared to OOA2 (2.1, 0.78). We have revised this caption as:

“Figure 9. The correlation between the difference among the four aerosol mixing state parameters and mass fractions (MF) of secondary aerosol chemical components during different periods. OOA1 and OOA2 are two SOA factors resolved from AMS measurements using the PMF technique. Moderately polluted period: Blue circle; Heavily polluted period: Red square; Clean period: Green pentagon.  $\text{NF}_A - \text{NF}_B$  ( $\text{NF}_{\text{noBC}} - \text{NF}_H$ ,  $\text{NF}_V - \text{NF}_H$ ,  $\text{NF}_{\text{noBC}} - \text{NF}_V$ ): The difference between the number fraction of A and B.  $\text{NF}_H$ : Number Fraction of Hydrophilic aerosol whose hygroscopicity parameter is higher than  $\sim 0.07$ .  $\text{NF}_V$ : Number Fraction of Volatile aerosol whose Shrink Factor at 200 °C is lower than 0.85.  $\text{NF}_{\text{noBC}}$ : Number Fraction of BC-free particles.”

*All figure captions need more text to explain the figure. One should understand the general content of a figure without reading the full text around. °C*

**Response:** Thanks for your suggestion. Besides the captions of Figures 1, 4 and 9 whose revision have been mentioned earlier, the captions of other figures are revised as:

“Figure 2. The campaign average of (a) Size-resolved Particle Activation Ratio (SPAR) curves measured by DMA-CCNC at the three supersaturations (SSs, represented by different colors and markers), (b) PDF of lag time measured by DMA-SP2 at four particle sizes (represented by different colors and markers), (c) PDF of growth factor GF (GFPDF) measured by HTDMA at four particle sizes (represented by different colors and markers), (d) PDF of shrinkage factor SF (SFPDF) measured by VTDMA under the temperature of 200 °C at five particle sizes (represented by different colors and markers). The shaded areas indicate the standard deviations.”

“Figure 3. (a-c): Size dependence of MAF (green circle),  $\text{NF}_H$  (blue triangle),  $\text{NF}_V$  (yellow

square),  $NF_{noBC}$  (red x) and  $R_{exBC}$  (black plus) during the three periods, MAF (Maximum Activation Fraction): An asymptote of the measured SPAR curve at large particle.  $NF_H$ : Number Fraction of Hydrophilic aerosol whose hygroscopicity parameter is higher than  $\sim 0.07$ .  $NF_V$ : Number Fraction of Volatile aerosol whose Shrink Factor at  $200\text{ }^\circ\text{C}$  is lower than 0.85.  $NF_{noBC}$ : Number Fraction of BC-free particles.  $R_{exBC}$ : Number fraction of externally BC particles in total BC-containing particles. (d-f): Corresponding mass fractions of aerosol chemical compositions (identified by colors) during the three periods, including secondary organic aerosols (SOA), biomass burning organic aerosol (BBOA), fossil fuel organic aerosols (FFOA), and inorganic ions including sulfate ( $SO_4$ ), nitrate ( $NO_3$ ) and ammonium ( $NH_4$ ).”

“Figure 5. The correlations between aerosol mixing state parameters and mass fractions (MF) of BBOA (Biomass Burning Organic Aerosol) and FFOA (Fossil Fuel Organic Aerosol) during different periods (Moderately polluted period: Blue dot or circle; Heavily polluted period: Red x or square; Clean period: Green plus or pentagon.), with  $r$  representing correlation coefficient. MAF (Maximum Activation Fraction): An asymptote of the measured SPAR curve at large particle.  $NF_H$ : Number Fraction of Hydrophilic aerosol whose hygroscopicity parameter is higher than  $\sim 0.07$ .  $NF_V$ : Number Fraction of Volatile aerosol whose Shrink Factor at  $200\text{ }^\circ\text{C}$  is lower than 0.85.  $NF_{noBC}$ : Number Fraction of BC-free particles.”

“Figure 6. The correlations between the ratio of external mixed BC in total BC particles ( $R_{exBC}$ ) and mass fractions (MF) of BBOA (Biomass Burning Organic Aerosol) and FFOA (Fossil Fuel Organic Aerosol) during different periods (Moderately polluted period: Blue dot; Heavily polluted period: Red x; Clean period: Green plus), with  $r$  representing correlation coefficient.”

“Figure 7. The correlations between the difference among the four aerosol mixing state parameters at particle size of 200 nm and mass fractions (MF) of BBOA (Biomass Burning Organic Aerosol) and FFOA (Fossil Fuel Organic Aerosol) during different periods (Moderately polluted period: Blue circle; Heavily polluted period: Red square; Clean period: Green pentagon), with  $r$  representing correlation coefficient.  $NF_A - NF_B$  ( $NF_{noBC} - NF_H$ ,  $NF_V - NF_H$ ,  $MAF - NF_H$ ): The difference between the number fraction of A and B. MAF (Maximum Activation Fraction): An asymptote of the measured SPAR curve at large particle.  $NF_H$ : Number Fraction of Hydrophilic aerosol whose hygroscopicity parameter is higher than  $\sim 0.07$ .  $NF_V$ : Number Fraction of Volatile aerosol whose Shrink Factor at  $200\text{ }^\circ\text{C}$  is lower than 0.85.  $NF_{noBC}$ : Number Fraction of BC-free particles.”

“Figure 8. The correlation between the four aerosol mixing state parameters and mass fraction (MF) of secondary aerosol components during different periods (Moderately polluted period: Blue dot or circle; Heavily polluted period: Red x or

square; Clean period: Green plus or pentagon.), with  $r$  representing correlation coefficient. MAF (Maximum Activation Fraction): An asymptote of the measured SPAR curve at large particle.  $NF_H$ : Number Fraction of Hydrophilic aerosol whose hygroscopicity parameter is higher than  $\sim 0.07$ .  $NF_V$ : Number Fraction of Volatile aerosol whose Shrink Factor at 200 °C is lower than 0.85.  $NF_{noBC}$ : Number Fraction of BC-free particles. Secondary aerosol components including secondary organic aerosols (SOA), sulfate (SO<sub>4</sub>), nitrate (NO<sub>3</sub>) and ammonium (NH<sub>4</sub>).”

“Figure 10. The variations of different aerosol mixing state parameters during the pollution accumulation process. (a) The time series of mass concentrations of non-refractory PM<sub>1</sub> (NR-PM<sub>1</sub>), secondary aerosols (SA, including inorganic ions and SOA), primary organic aerosols (POA) and BC (identified by colors and markers). (b and c) The variations of different aerosol mixing state parameters (identified by colors and markers) at particle size of 200nm (b) and 300nm (c); (d and e) The variations of the difference between  $NF_V$  and  $NF_{noBC}$  ( $NF_V - NF_{noBC}$ , blue large circle) and the difference between  $NF_V$  and  $NF_{noBC} + NF_{CBC}$  ( $NF_V - (NF_{noBC} + NF_{CBC})$ , yellow small circle) with the mass concentration of SA at particle size of 200nm (d) and 300nm (e). MAF (Maximum Activation Fraction): An asymptote of the measured SPAR curve at large particle.  $NF_H$ : Number Fraction of Hydrophilic aerosol whose hygroscopicity parameter is higher than  $\sim 0.07$ .  $NF_V$ : Number Fraction of Volatile aerosol whose Shrink Factor at 200 °C is lower than 0.85.  $NF_{CBC}$ : Number Fraction of thickly coated BC particles.”

*Line 472: exemplarily ‘difference between  $NF_V - NF_H$ ’ means difference between  $NF_V$  and  $NF_H$ ? This appears several times around this section.*

**Response:** Yes, we have revised it as “difference between  $NF_V$  and  $NF_H$  ( $NF_V - NF_H$ )”. Similar revisions includes:

**L427-434:** “The difference between  $NF_{noBC}$  and  $NF_H$  ( $NF_{noBC} - NF_H$ ) both had significant positive correlations with MFFFOA and MFBBOA ( $r > 0.5$ ), suggesting that a substantial proportion of POA resided in BC-free aerosols and was volatile but contributed substantially to nearly hydrophobic aerosols. So was the difference between  $NF_V$  and  $NF_H$  ( $NF_V - NF_H$ ). The mass fractions of BBOA and FFOA were poorly linked with the difference between MAF and  $NF_V$  ( $MAF - NF_V$ ), or MAF and  $NF_{noBC}$  ( $MAF - NF_{noBC}$ ), or  $NF_V$  and  $NF_{noBC}$  ( $NF_V - NF_{noBC}$ ) (Fig. S7). The difference between MAF and  $NF_H$  ( $MAF - NF_H$ ) had a positive correlation with MFBBOA, further suggesting BBOA contributed to nearly hydrophobic aerosols under subsaturated conditions, however, their hygroscopicity was enhanced and became CCN-active at supersaturated conditions.”

**L464:** “Difference between  $NF_{noBC}$  and  $NF_H$  ( $NF_{noBC} - NF_H$ ) showed a strong negative correlation with  $MF_{NH_4}$  and  $MF_{NO_3}$ . So did the Difference between  $NF_V$  and  $NF_H$  ( $NF_V -$

NF<sub>H</sub>.)”

**L483:** “The difference between NF<sub>noBC</sub> and NF<sub>V</sub> (NF<sub>noBC</sub>-NF<sub>V</sub>) is negatively correlated with MF<sub>NO<sub>3</sub></sub>, which is consistent with the semi-volatile nature of nitrate.”

**L555:** “... the two resolved SOA factors exhibited different impacts on the difference between NF<sub>V</sub> and NF<sub>H</sub> (NF<sub>V</sub>-NF<sub>H</sub>), ...”

**Figure 10:** “... (d and e) The variations of the difference between Number Fraction of Volatile aerosol and BC-free particles (NF<sub>V</sub>-NF<sub>noBC</sub>, blue large circle) and the difference between NF<sub>V</sub> and the number fraction of thickly coated BC containing aerosols (NF<sub>CBC</sub>) plus NF<sub>noBC</sub> (NF<sub>V</sub>-(NF<sub>noBC</sub>+NF<sub>CBC</sub>), yellow small circle) with the mass concentration of SA at particle size of 200nm (d) and 300nm (e).”

*Minor comments/ typos:*

*Comment: I did not look explicitly for all typos, because I think, several parts need to be rewritten und after that it should be read again carefully.*

*Line 293: PA means probably POA*

*Line 319: in large diameters **s** ranges*

*Line 334: a dot after ‘size’ is missing*

*Line 439: ‘are presented’ should be ‘is presented’*

**Response:** Thanks for your suggestion and we have revised them accordingly. We have also checked the manuscript again and other revisions include:

**L333:** “This particle group had the ~~lowest~~ highest fraction (higher than 0.7) during the heavily polluted period and the ~~highest~~ lowest fraction (down to 0.5) during the clean period, ...”

**L352:** “non-negligible fractions of BC-free aerosols dominated ~~within~~ these less volatile aerosol components”

**L441:** “... had a strong positive correlation with MF<sub>NH<sub>4</sub></sub> ~~ammonium~~ ...”

**L412:** “... demonstrating ~~the~~ significant contributions ...”

**L413:** “(NF<sub>H</sub> and NF<sub>noBC</sub> are larger and smaller than 0.7 when MFFFOA was larger than 0.1, respectively)”

**L432:** “... further suggesting that BBOA contributed to nearly ...”

**Reference:**

Hong, J., Äijälä, M., Häme, S. A. K., Hao, L., Duplissy, J., Heikkinen, L. M., Nie, W., Mikkilä, J., Kulmala, M., Prisle, N. L., Virtanen, A., Ehn, M., Paasonen, P., Worsnop, D. R., Riipinen, I., Petäjä, T., and Kerminen, V.-M.: Estimates of the organic aerosol volatility in a boreal forest using two independent methods, *Atmos. Chem. Phys.*, **17**, 4387–4399, <https://doi.org/10.5194/acp-17-4387-2017>, 2017.

Kim, N., Yum, S. S., Park, M., Park, J. S., Shin, H. J., and Ahn, J. Y.: Hygroscopicity of urban aerosols and its link to size-resolved chemical composition during spring and summer in Seoul, Korea, *Atmos. Chem. Phys.*, **20**, 11245–11262, <https://doi.org/10.5194/acp-20-11245-2020>, 2020.

Moteki, N., & Kondo, Y. (2007). Effects of mixing state on black carbon measurements by laser-induced incandescence. *Aerosol Science and Technology*, **41**(4), 398–417. <https://doi.org/10.1080/02786820701199728>

Sedlacek, A. J., Lewis, E. R., Kleinman, L., Xu, J., & Zhang, Q. (2012). Determination of and evidence for non-core-shell structure of particles containing black carbon using the single-particle soot photometer (SP2). *Geophysical Research Letters*, **39**, L06802. <https://doi.org/10.1029/2012GL050905>

Subramanian, R., Kok, G. L., Baumgardner, D., Clarke, A., Shinozuka, Y., Campos, T. L., et al. (2010). Black carbon over Mexico: The effect of atmospheric transport on mixing state, mass absorption cross-section, and BC/CO ratios. *Atmospheric Chemistry and Physics*, **10**(1), 219–237. <https://doi.org/10.5194/acp-10-219-2010>

Tao, J., Kuang, Y., Ma, N., Hong, J., Sun, Y., Xu, W., Zhang, Y., He, Y., Luo, Q., Xie, L., Su, H., and Cheng, Y.: Secondary aerosol formation alters CCN activity in the North China Plain, *Atmos. Chem. Phys.*, **21**, 7409–7427, <https://doi.org/10.5194/acp-21-7409-2021>, 2021.

Zhang, S. L., Ma, N., Kecorius, S., Wang, P. C., Hu, M., Wang, Z. B., Größ, J., Wu, Z. J., and Wiedensohler, A.: Mixing state of atmospheric particles over the North China Plain, *Atmospheric Environment*, **125**, 152–164, 2016.

Zhang, Y., Su, H., Ma, N., Li, G., Kecorius, S., Wang, Z., et al. (2018). Sizing of ambient particles from a single-particle soot photometer measurement to retrieve mixing state of black carbon at a regional site of the North China Plain. *Journal of Geophysical Research: Atmospheres*, **123**, 12,778–12,795. <https://doi.org/10.1029/2018JD028810>

Zhao, G., Tan, T., Hu, S., Du, Z., Shang, D., Wu, Z., Guo, S., Zheng, J., Zhu, W., Li, M., Zeng, L., and Hu, M.: Mixing state of black carbon at different atmospheres in north and southwest China, *Atmos. Chem. Phys.*, **22**, 10861–10873, <https://doi.org/10.5194/acp-22-10861-2022>, 2022.
